# Supplementary material for: Altered NKp30, NKp46, NKG2D, and DNAM-1 Expression on Circulating NK Cells Is Associated with Tumor Progression in Human Gastric Cancer
Source: J Immunol Res. 2018 Sep 3;2018:6248590. doi: 10.1155/2018/6248590 (PMC6140275; doi:10.1155/2018/6248590)
Supplement: Supplementary Materials — The prevalence of circulating NK cells in GC patients. (A) A representative flow cytometry analysis of CD3−CD56+ NK cells, CD3+CD56+ NKT cells, and CD3+CD56− T cells in the peripheral blood of GC patients (GC blood) and healthy donors (normal blood). Whole peripheral blood with lysed red cells were stained with PE-Cy7 anti-human CD56 and APC anti-human CD3 antibodies, and CD3−CD56+ NK-cell, CD3+CD56+ NKT-cell, and CD3+CD56− T-cell percentages were analyzed from the lymphocyte gate as defined by FSC and SSC dot-plot. (B) Statistical analysis of CD3−CD56+ NK-cell, CD3+CD56+ NKT-cell, and CD3+CD56− T-cell levels in the peripheral blood of 30 GC patients and 30 healthy donors. Data were expressed as the mean ± SEM. Each plot represents a single donor. Supplementary Figure 2. CD107a degranulation of circulating NK cells from 2 GC patients and 2 healthy donors (controls). 2 × 105 NK cells were cultured with K562 cells at 10 : 1 effector/target ratio for 1 h at 37°C and incubated with anti-CD107a-FITC (H4A3, BioLegend), followed by an additional 4-hour incubation in the presence of protein transport inhibitor (GolgiStop, BD Bioscience). After that, cells were washed, stained with anti-CD56-APC (MEM-188, BioLegend), and subjected to flow cytometric analysis. Supplementary Figure 3. The expression of perforin and granzyme B in circulating CD3−CD56+ NK cells of GC patients. (A) Statistical analysis of perforin+ and granzyme B+ NK-cell levels in the peripheral blood of 30 GC patients and 30 healthy donors. (B) Correlation of the percentages of perforin+ NK cells with the percentages of NKp30+, NKp46+, NKG2D+, and DNAM-1+ NK cells in GC patients. ∗∗∗, P < 0.001. Supplementary Figure 4. The plasma concentrations of TGF-β1 in 30 healthy donors (normal controls) and 30 GC patients. P < 0.05 was considered to be significant. Supplementary Figure 5. No alteration of CD16, CD158a/h, CD94, CD158b, NKG2A, CD158e1, and 2B4 expression on NK cells after TGF-β1 stimulation. Purified NK cel [file 6248590.f1.pdf]

**Supplementary Figure 1 through 6 and Supplementary table 1**

**Figure S1.** The prevalence of circulating NK cells in GC patients. **Figure S2.** CD107a degranulation of circulating NK cells from GC patients and healthy donors. **Figure S3.** The correlation between the percentages of Perforin<sup>+</sup> NK cells and the percentages of NKp30<sup>+</sup>, NKp46<sup>+</sup>, NKG2D<sup>+</sup> as well as DNAM-1<sup>+</sup> NK cells in GC patients. **Figure S4.** The plasma concentrations of TGF-β1 in 30 healthy donors and 30 GC patients. **Figure S5.** No alteration of CD16, CD158a/h, CD94, CD158b, NKG2A, CD158e1 and 2B4 expression on NK cells after TGF-β1 stimulation. **Figure S6.** The comparison of TGF-β1 levels between stage I-II and stage III-IV of GC patients. **Table S1.** Clinical characteristics of 30 GC patients and 30 healthy donors.

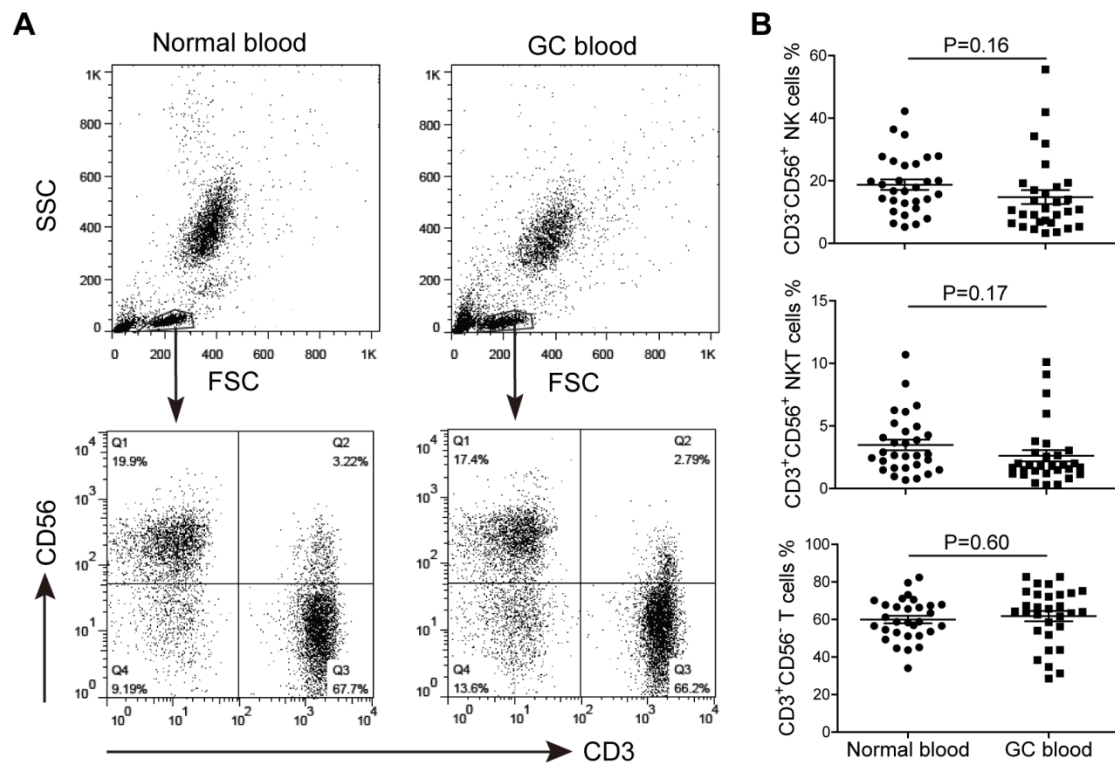

**Supplementary Figure 1.** The prevalence of circulating NK cells in GC patients. (A) A representative flow cytometry analysis of CD3<sup>-</sup>CD56<sup>+</sup> NK cells, CD3<sup>+</sup>CD56<sup>+</sup> NKT cells and CD3<sup>+</sup>CD56<sup>-</sup> T cells in the peripheral blood of GC patients (GC blood) and healthy donors (normal blood). Whole peripheral blood with lysed red cells were stained with PE-Cy7 anti-human CD56 and APC anti-human CD3 antibodies, and CD3<sup>-</sup>CD56<sup>+</sup> NK-cell, CD3<sup>+</sup>CD56<sup>+</sup> NKT-cell and CD3<sup>+</sup>CD56<sup>-</sup> T-cell percentages were analyzed from the lymphocyte gate as defined by an FSC and SSC dot-plot. (B) Statistical analysis of CD3<sup>-</sup>CD56<sup>+</sup> NK-cell, CD3<sup>+</sup>CD56<sup>+</sup> NKT-cell and CD3<sup>+</sup>CD56<sup>-</sup> T-cell levels in the peripheral blood of 30 GC patients and 30 healthy donors. Data were expressed as the mean ± SEM. Each plot represents a single donor.

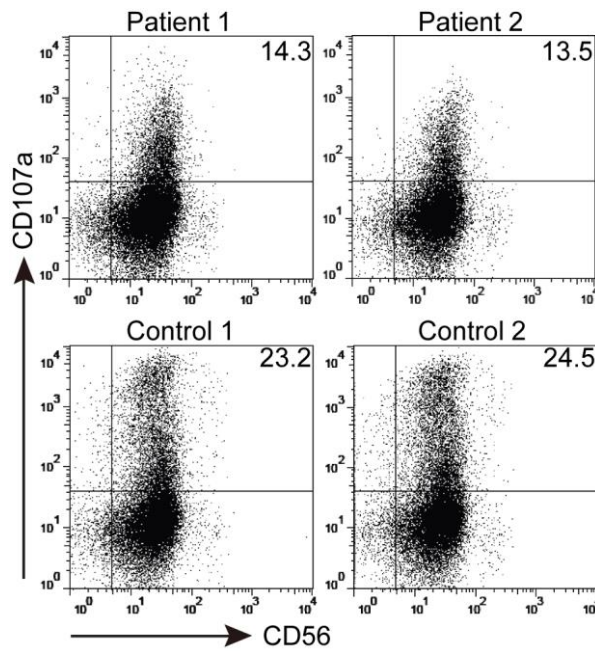

**Supplementary Figure 2.** CD107a degranulation of circulating NK cells from 2 GC patients and 2 healthy donors (controls).  $2 \times 10^5$  NK cells were cultured with K562 cells at 10:1 effector/target ratio for 1 h at 37 °C and incubated with anti-CD107a-FITC (H4A3, Biolegend), followed by an additional 4-hour incubation in the presence of protein transport inhibitor (GolgiStop, BD Bioscience). After that, cells were washed, stained with anti-CD56-APC (MEM-188, Biolegend), and subjected to flow cytometric analysis.

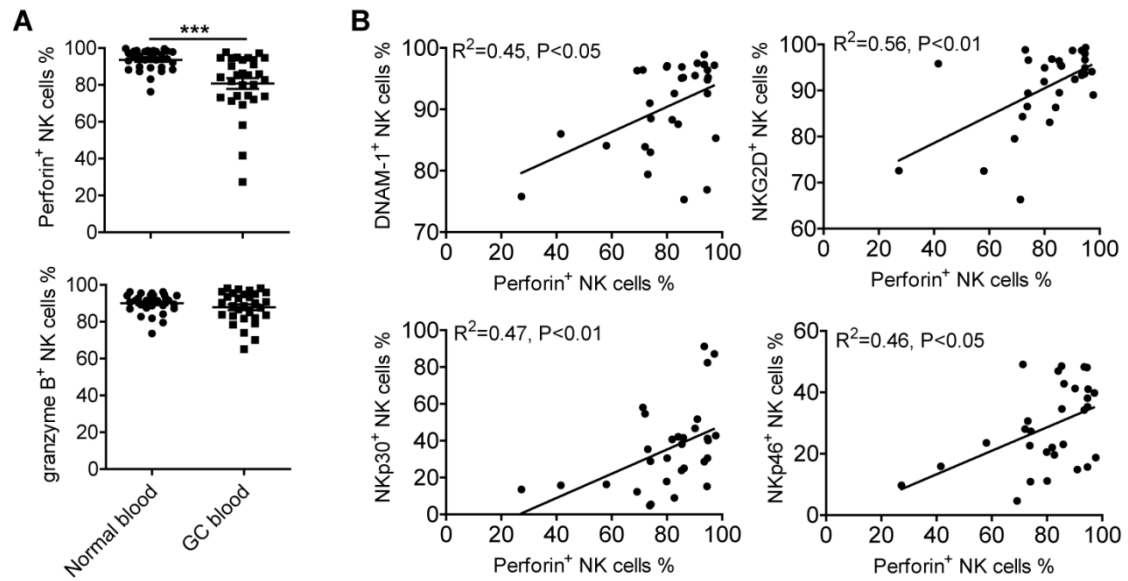

**Supplementary Figure 3.** The expression of Perforin and granzyme B in circulating CD3<sup>+</sup>CD56<sup>+</sup> NK cells of GC patients. (A) Statistical analysis of Perforin<sup>+</sup> and granzyme B<sup>+</sup> NK-cell levels in the peripheral blood of 30 GC patients and 30 healthy donors. (B) Correlation of the percentages of Perforin<sup>+</sup> NK cells with the percentages of NKp30<sup>+</sup>, NKp46<sup>+</sup>, NKG2D<sup>+</sup> and DNAM-1<sup>+</sup> NK cells in GC patients. <sup>\*\*\*</sup>,  $P<0.001$ .

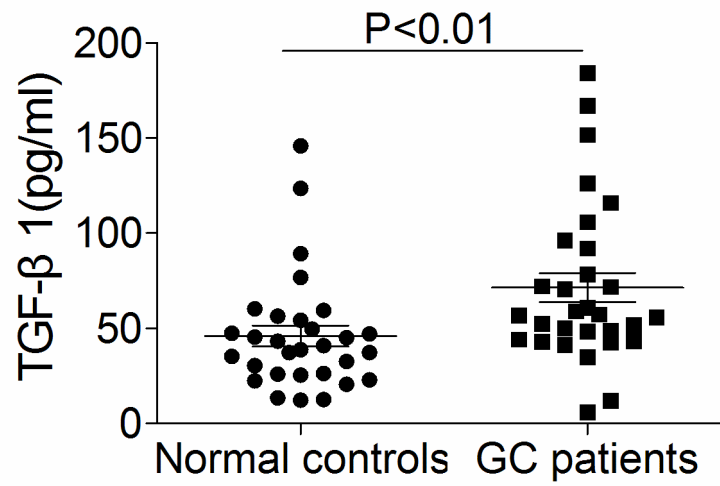

**Supplementary Figure 4.** The plasma concentrations of TGF-β1 in 30 healthy donors (normal controls) and 30 GC patients.  $P<0.05$  was considered to be significant.

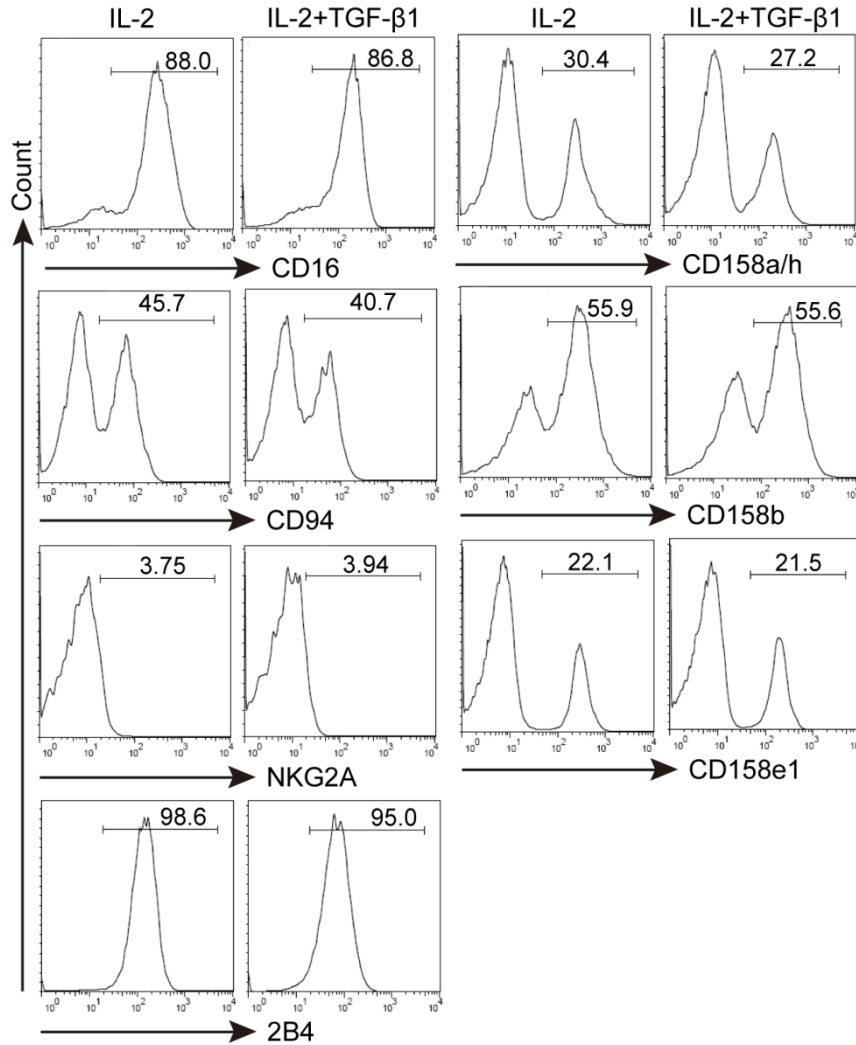

**Supplementary Figure 5.** No alteration of CD16, CD158a/h, CD94, CD158b, NKG2A , CD158e1 and 2B4 expression on NK cells after TGF- $\beta$ 1 stimulation. Purified NK cells from healthy donors were seeded in 96-well plates supplemented with 1000 U/ml rhIL-2 for 48 hours with or without 10 ng/ml rhTGF- $\beta$ , and the expression of CD16, CD158a/h, CD94, CD158b, NKG2A , CD158e1 and 2B4 on NK cells were detected by flow cytometry (n=4).



**Supplementary Table 1** Clinical characteristics of 30 GC patients and 30 healthy donors

| Variables                               | GC patients | healthy donors |
|-----------------------------------------|-------------|----------------|
| Sex (male/female)                       | 20/10       | 20/10          |
| Age (y), median (range)                 | 51, 28-75   | 51, 28-75      |
| Tumor (T) invasion (T1/T2/T3/T4)        | 2/5/2/21    | 0              |
| Lymphoid nodal (N) status (N0/N1/N2/N3) | 7/2/7/14    | 0              |
| Distant metastasis (M) status (M0/M1)   | 28/2        | 0              |
| TNM stage ( I / II /III/IV)             | 3/7/18/2    | 0              |
| Histologic type (good/moderate/poor)    | 0/10/20     | 0              |
